# Supplementary material for: Aire-Overexpressing Dendritic Cells Induce Peripheral CD4+ T Cell Tolerance
Source: MDPI journal article supplement (doi:10.3390/ijms17010038), 2015-12-29
Supplement: s1 [file s1]

# Supplementary Materials: Aire-Overexpressing Dendritic Cells Induce Peripheral CD4<sup>+</sup> T Cell Tolerance

Dongbei Li, Haijun Li, Haiying Fu, Kunwei Niu, Yantong Guo, Chuan Guo, Jitong Sun, Yi Li and Wei Yang

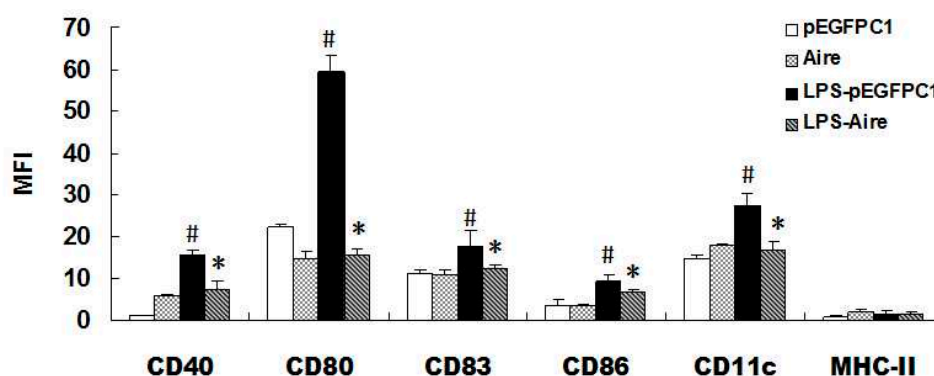

**Figure S1.** The expression of CD40, CD80, CD83, CD86, CD11c and MHC II were detected by FACS in Aire and control cells with or without stimulation with 10  $\mu$ g/mL of LPS for 24 h; #  $p < 0.05$ , LPS stimulation *vs.* control; \*  $p < 0.05$ , Aire *vs.* pEGFPC1.

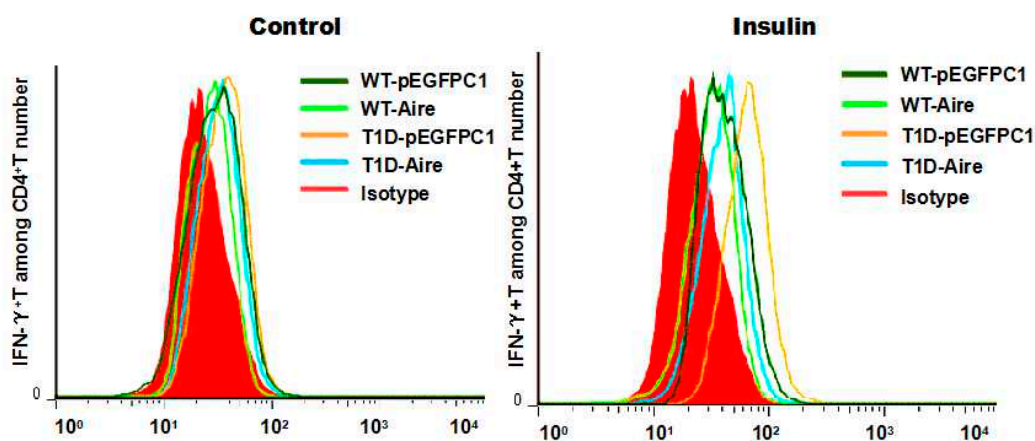

**Figure S2.** Splenocytes from STZ-induced T1D mice or WT mice co-cultured with Aire or control cells for 48 h in the presence of insulin. The IFN- $\gamma$  expression levels in CD4<sup>+</sup> T cells were examined by FACS.

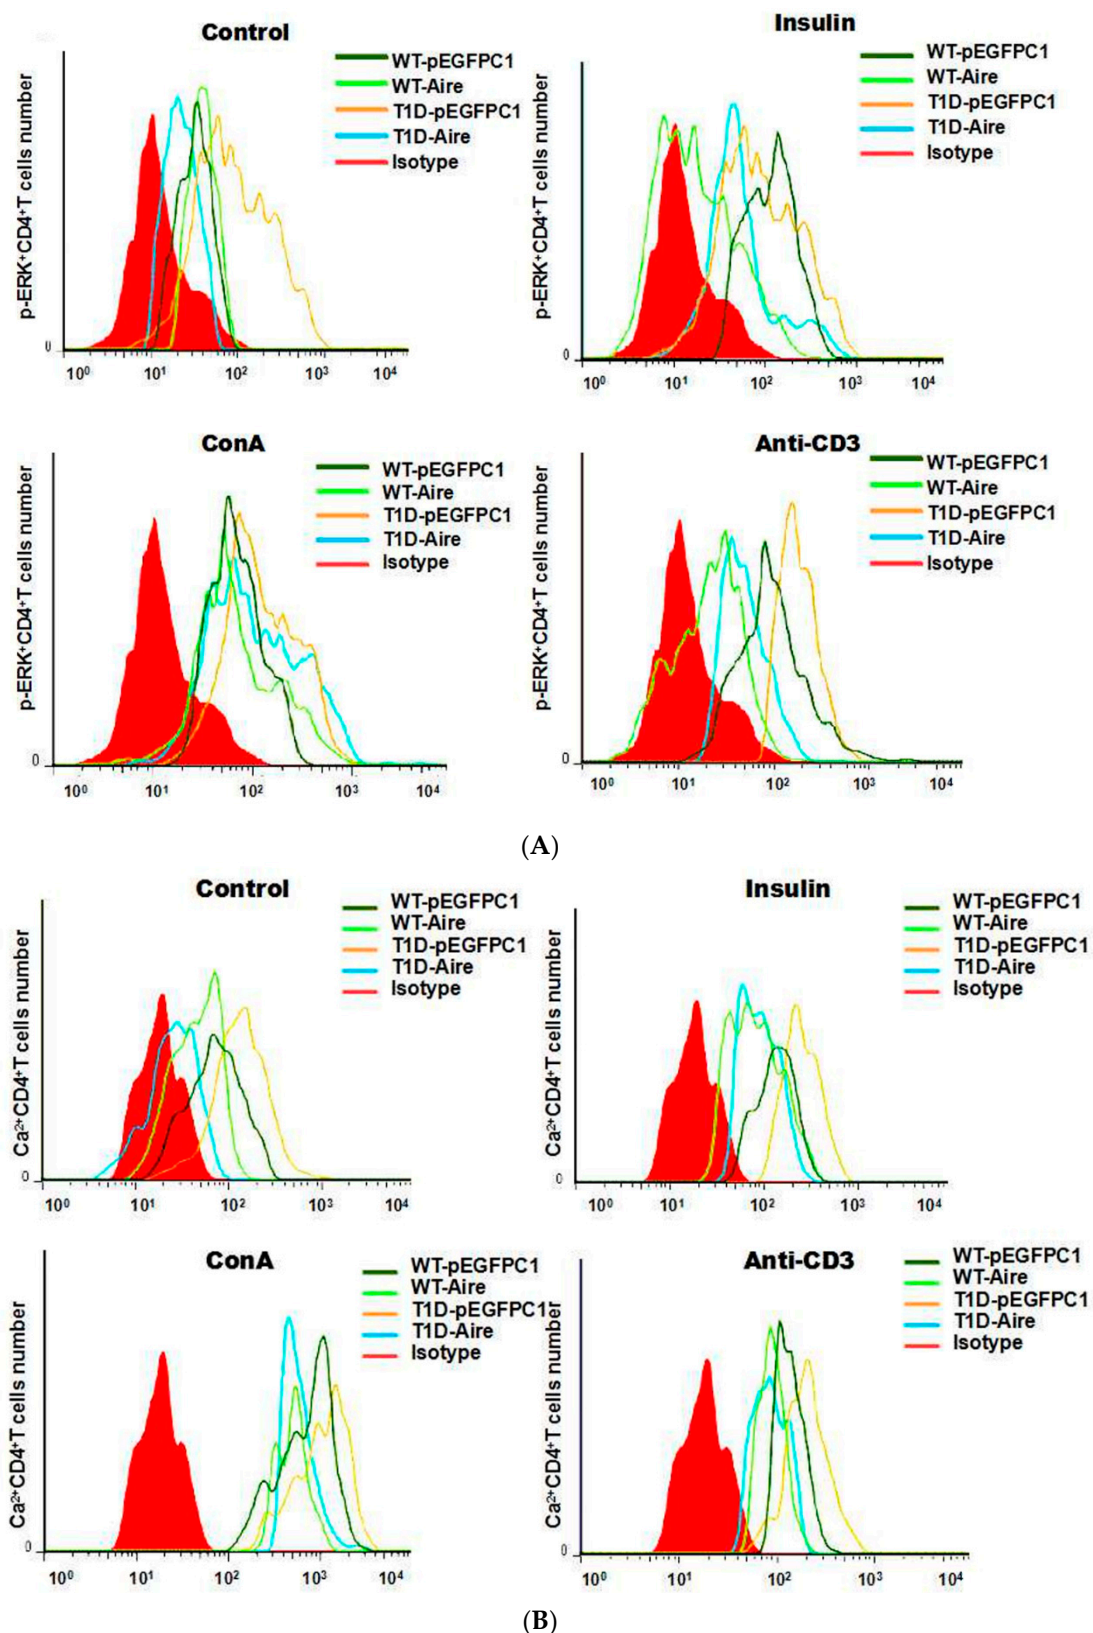

**Figure S3.** (A) The p-ERK expression levels; and (B) the concentration of  $Ca^{2+}$  in CD4<sup>+</sup>T cells were examined by FACS.

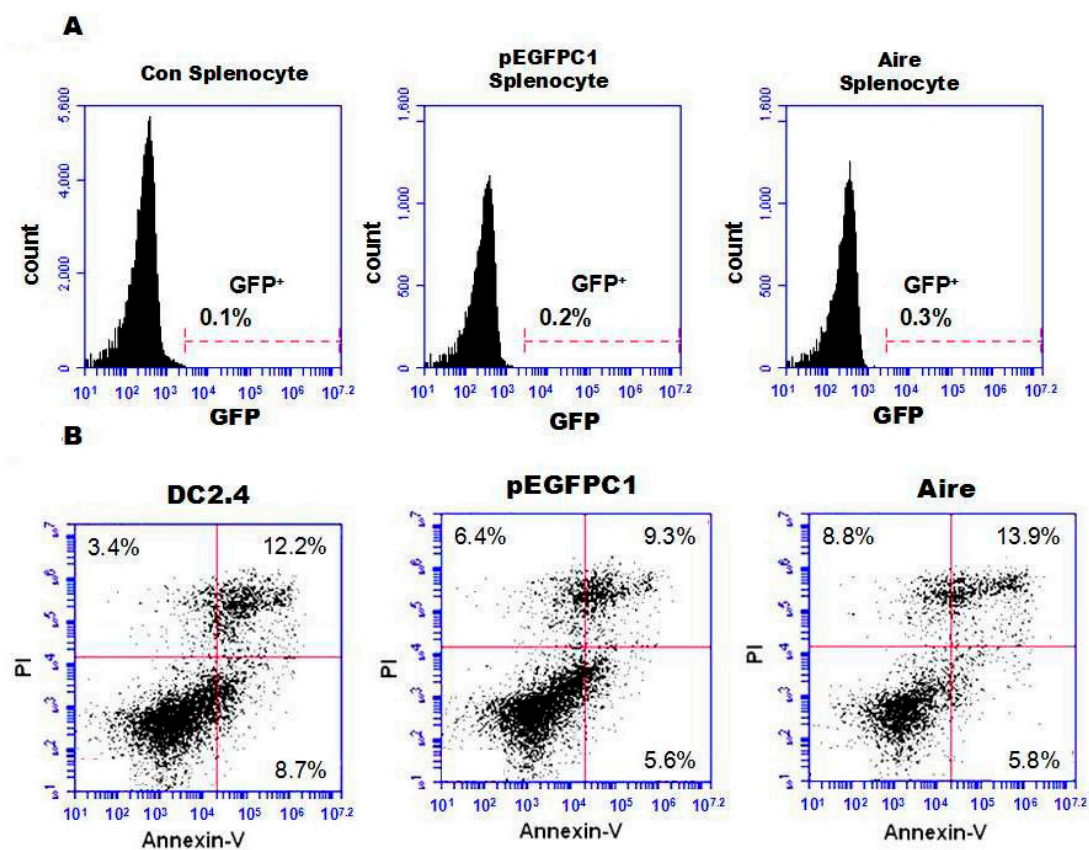

**Figure S4.** (A) Percentage of GFP+ cells in splenocyte isolated from the co-cultured medium. (B) The % of apoptotic T-cells which co-cultured with DC cells.
